# Supplementary material for: Plastic drawing response in the biaxially oriented polypropylene (BOPP) process: polymer structure and film casting effects
Source: publisher site journal article supplement (doi:10.1515/polyeng-2019-0220), 2019-11-19
Supplement: Supplementary file 1 [file polyeng-2019-0220_suppl.docx]

**Supplementary material**

**Plastic drawing response in the biaxially oriented polypropylene (BOPP) process: polymer structure and film casting effects**

Dietrich Gloger, Elisabeth Rossegger, Markus Gahleitner and Christina Wagner

DOI 10.1515/polyeng-2019-0220

### **Table S1:** Relative crystallinity XC and β-phase content kβ from WAXS, and 1st heat melting point TM from DSC as function of extrusion parameters (Tmelt - TCR - Qmelt) and iPP type.

|  | 230-15-60 | 230-15-90 | 230-80-60 | 230-80-90 | 250-47-80 | 250-47-80 | 270-15-60 | 270-15-90 | 270-80-60 | 270-80-90 |
| --- | --- | --- | --- | --- | --- | --- | --- | --- | --- | --- |
|  |  | | | | | | | | | |
|  | Crystallinity XC / % | | | | | | | | | |
|  |  |  |  |  |  |  |  |  |  |  |
| PP1 | 30 | 30 | 61 | 63 | 54 | 48 | 29 | 30 | 63 | 62 |
| PP2 | 35 | 34 | 63 | 64 | 57 | 58 | 32 | 33 | 63 | 63 |
| PP3 | 40 | 43 | 63 | 65 | 56 | 57 | 37 | 40 | 66 | 64 |
|  |  |  |  |  |  |  |  |  |  |  |
|  | β-phase content k**β / -** | | | | | | | | | |
|  |  | | | | | | | | | |
| PP1 | - | - | 0.03 | 0.05 | 0.02 | 0.02 | - | - | 0.02 | 0.05 |
| PP2 | - | - | 0.05 | 0.09 | 0.02 | 0.01 | - | - | 0.04 | 0.10 |
| PP3 | 0.01 | 0.02 | 0.15 | 0.19 | 0.02 | 0.02 | 0.03 | 0.01 | 0.12 | 0.13 |
|  |  |  |  |  |  |  |  |  |  |  |
|  | Melting point TM / °C | | | | | | | | | |
|  |  | | | | | | | | | |
| PP1 | 161 | 161 | 160 | 161 | 162 | 160 | 162 | 160 | 161 | 160 |
| PP2 | 165 | 164 | 163 | 163 | 164 | 162 | 164 | 163 | 162 | 163 |
| PP3 | 164 | 164 | 164 | 165 | 163 | 163 | 164 | 164 | - | - |
|  |  |  |  |  |  |  |  |  |  |  |

(a) (b)

**Figure S1:** DSC scans (1st heat) for cast films produced at different chill-roll temperature from iPP grades (a) PP1 and (b) PP3.

Table S2: Yield stress and tensile modulus of primary cast sheet in MD and TD as function of extrusion parameters (Tmelt - TCR - Qmelt) and iPP type.

|  |  | 230-15-60 | 230-15-90 | 230-80-60 | 230-80-90 | 250-47-80 | 250-47-80 | 270-15-60 | 270-15-90 | 270-80-60 | 270-80-90 |
| --- | --- | --- | --- | --- | --- | --- | --- | --- | --- | --- | --- |
|  |  |  | | | | | | | | | |
|  |  | Yield Stress / MPa | | | | | | | | | |
|  |  |  | | | | | | | | | |
| MD | PP1 | 24 | 25 | 35.8 | 37 | 31.3 | 31 | 22 | 24 | 35 | 36 |
| PP2 | 29 | 29 | 36.5 | 37 | 33.6 | 33 | 26 | 28 | 37 | 37 |
| PP3 | 30 | 31 | 37.4 | 37 | 35.4 | 35 | 29 | 30 | 37 | 36 |
|  |  |  |  |  |  |  |  |  |  |  |  |
| TD | PP1 | 24 | 25 | 34 | 35 | 30 | 30 | 22 | 24 | 34 | 35 |
| PP2 | 26 | 26 | 32 | 34 | 30 | 30 | 25 | 26 | 33 | 34 |
| PP3 | 30 | 28 | 38 | - | 33 | 32 | 27 | 29 | 34 | 33 |
|  |  |  |  |  |  |  |  |  |  |  |  |
|  |  | Tensile Modulus / MPa | | | | | | | | | |
|  |  |  | | | | | | | | | |
| MD | PP1 | 882 | 905 | 1324 | 1519 | 1262 | 1176 | 880 | 938 | 1449 | 1466 |
| PP2 | 1197 | 1187 | 1544 | 1589 | 1380 | 1353 | 1060 | 1153 | 1537 | 1620 |
| PP3 | 1284 | 1305 | 1659 | 1660 | 1514 | 1513 | 1231 | 1250 | 1656 | 1645 |
|  |  |  |  |  |  |  |  |  |  |  |  |
| TD | PP1 | 883 | 888 | 1253 | 1439 | 1219 | 1145 | 870 | 925 | 1377 | 1398 |
| PP2 | 1061 | 1057 | 1290 | 1404 | 1235 | 1201 | 1020 | 1066 | 1369 | 1386 |
| PP3 | 1262 | 1153 | 1638 | 1494 | 1403 | 1311 | 1137 | 1208 | 1413 | 1391 |
|  |  |  |  |  |  |  |  |  |  |  |  |

**Table S3:** Network modulus GN as function of extrusion parameters (Tmelt - TCR - Qmelt), iPP type and drawing temperature (Tdraw).

|  |  | 1 | 2 | 3 | 4 | 5 | 6 | 7 | 8 | 9 | 10 |
| --- | --- | --- | --- | --- | --- | --- | --- | --- | --- | --- | --- |
|  |  | 230-15-60 | 230-15-90 | 230-80-60 | 230-80-90 | 250-47-80 | 250-47-80 | 270-15-60 | 270-15-90 | 270-80-60 | 270-80-90 |
|  |  |  | | | | | | | | | |
|  |  | GN at Tdraw 157°C, N/mm² | | | | | | | | | |
|  |  |  | | | | | | | | | |
| MD | PP1 | 0.81 | 0.95 | 0.79 | 0.84 | 0.93 | 0.88 | 0.77 | 0.88 | 0.78 | 0.92 |
| PP2 | 0.97 | 1.07 | 1.02 | 1.00 | 1.11 | 1.07 | 0.91 | 0.76 | 0.93 | 0.61 |
| PP3 | 1.03 | 1.15 | 1.22 | 1.13 | 1.18 | 1.3 | 1.04 | 1.07 | 1.26 | 1.16 |
|  |  |  |  |  |  |  |  |  |  |  |  |
| TD | PP1 | 0.63 | 0.65 | 0.67 | 0.59 | 0.72 | 0.53 | 0.61 | 0.63 | 0.66 | 0.65 |
| PP2 | 0.75 | 0.77 | 0.76 | 0.66 | 0.8 | 0.77 | 0.74 | 0.47 | 0.72 | 0.43 |
| PP3 | 0.71 | 0.74 | 0.78 | 0.76 | 0.74 | 0.87 | 0.74 | 0.75 | 0.72 | 0.76 |
|  |  |  |  |  |  |  |  |  |  |  |  |
|  |  | GN at Tdraw 160°C, N/mm² | | | | | | | | | |
|  |  |  |  |  |  |  |  |  |  |  |  |
| MD | PP1 | 0.51 | 0.81 | 0.75 | 0.66 | 0.93 | 0.83 | 0.86 | 0.58 | 0.75 | 0.90 |
| PP2 | 0.88 | 1.06 | 1.04 | 1.02 | 1.07 | 1.08 | 0.94 | 1.00 | 0.94 | 1.00 |
| PP3 | 1.25 | 1.3 | 1.36 | 1.25 | 1.75 | 0.95 | 1.05 | 1.15 | 1.22 | 1.18 |
|  |  |  |  |  |  |  |  |  |  |  |  |
| TD | PP1 | 0.25 | 0.36 | 0.5 | 0.38 | 0.5 | 0.43 | 0.48 | 0.23 | 0.56 | 0.55 |
| PP2 | 0.64 | 0.53 | 0.66 | 0.59 | 0.67 | 0.69 | 0.64 | 0.62 | 0.66 | 0.69 |
| PP3 | 0.71 | 0.67 | 0.67 | 0.68 | 0.63 | 0.65 | 0.68 | 0.65 | 0.68 | 0.65 |
|  |  |  |  |  |  |  |  |  |  |  |  |

(a) (b)

**Figure S2:** Effect of (a) melt temperature (270 vs. 230°C) and (b) chill roll temperature (15 vs. 80°C) on GN for all iPP grades in the BOPP study.

**Figure S3:** Correlation between the anisotropy in network modulus GN and CF tensile modulus for different stretch temperatures.
